# Supplementary material for: Drosophila Nesprin-1 Isoforms Differentially Contribute to Muscle Function
Source: MDPI journal article supplement (doi:10.3390/cells10113061), 2021-11-06
Supplement: s1 [file s1]

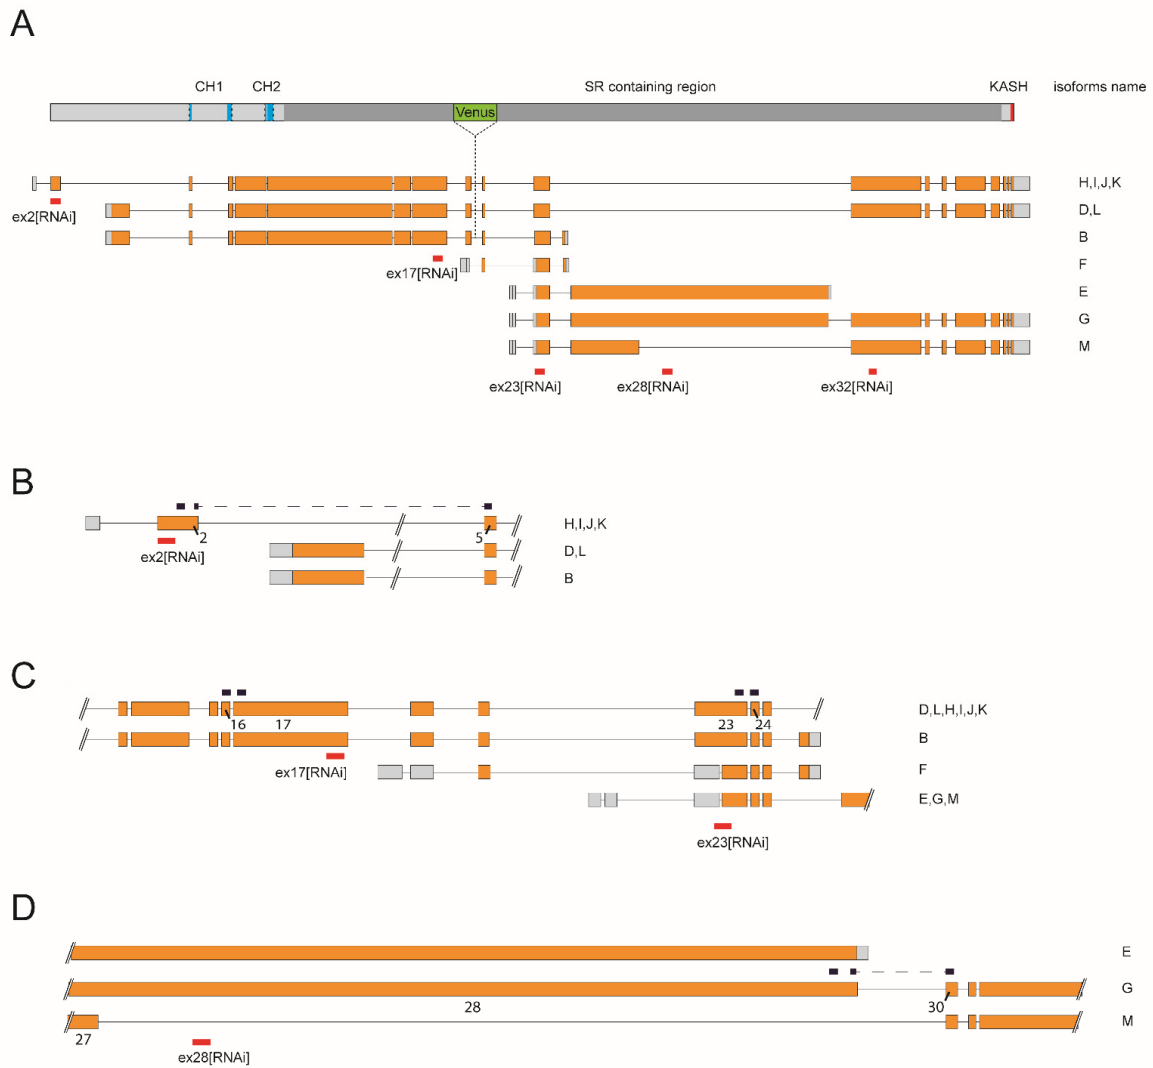

**Figure S1: RT-qPCR primers position with respect to RNAi target exons.** (A) Schematic representation of Msp300 isoforms as in Figure 1. (B-D) Close-ups of the exons targeted by RNAi and their immediate neighbours showing the position of the ex[RNAi] in red and of the primer couples used to assess the expression levels of the RNAi targeted exons in black. B-Close-up of the exons 1 to 5 showing the position of ex2[RNAi] (in red) and of the primer couple ex2-5 used to assess the level of ex2 expression by RT-qPCR. (C) Close-up of exons 13 to 27 showing the position of ex17[RNAi] and ex23[RNAi] as well as the primer couples ex16-17 and ex23-24. (D) Close-up of exons 27 to 32 showing the position of ex28[RNAi] and of the primer couple ex28-30.

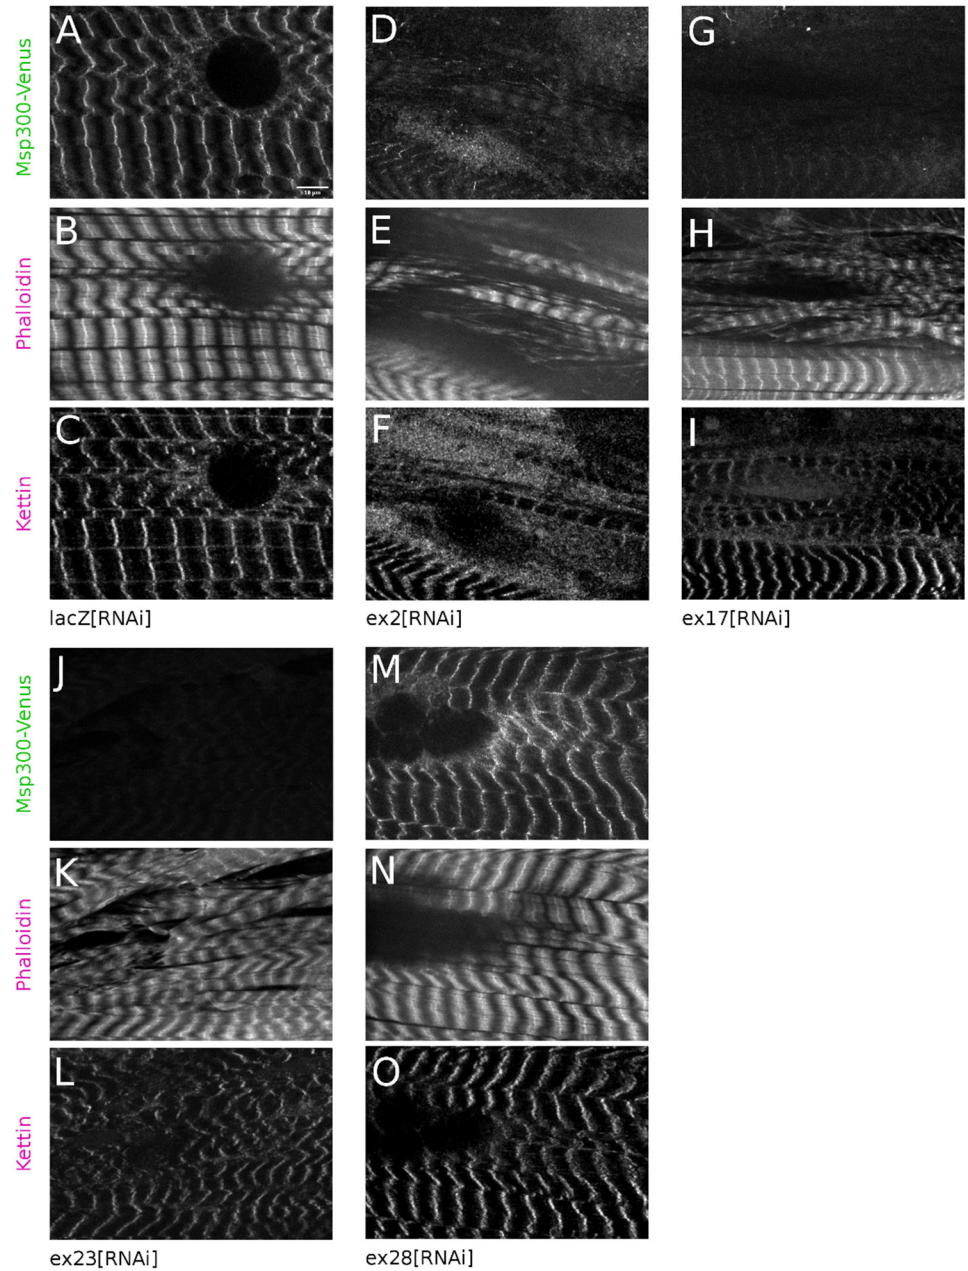

**Figure S2. Msp300-Venus, phalloidin and Kettin localisation after isoforms depletion by RNAi.** Single channel of overlays from Figure 5 showing the localisation of Msp300-Venus (A,D,G,J,M), phalloidin (B,E,H,K,N) and Kettin (C,F,I,L,O). (A-C) lacZ[RNAi], (D-F) ex2[RNAi], (G-I) ex17[RNAi], (J-L) ex23[RNAi] and (M-O) ex28[RNAi]. For a full description of all RNAi used, channels corresponding to ex23[RNAi] muscle 4 are shown here. Following ex23[RNAi], Msp300-Venus is completely lost, validating the strength of this RNAi to deplete all CH+ Msp300. Scale bar on lacZ[RNAi] panel A: 10  $\mu$ m.

**Table S1.** RT-qPCR primers sequences.

| <b>Name</b> | <b>Sequence</b>         |
|-------------|-------------------------|
| ex2-ex5_F   | GAGGAGTTCGGTCCTTCGAC    |
| ex2-ex5_R   | CACGTTCTTGCTCCTCTTGC    |
| ex16-ex17_F | TCGGTGACAAGCGGTGCGAG    |
| ex16-ex17_R | CTGACCAGCCTGCTTCTTGGCA  |
| ex23-ex24_F | GTGGGCGATCTCAAGGACAA    |
| ex23-ex24_R | TTTTCGTGCCAGGAGCGTAT    |
| ex28-ex30_F | AATACCGGTGCGGTACGAC     |
| ex28-ex30_R | CTTGCGTAATTAGATCCTTCTGG |
| tbp-1_F     | AGTGGTGCTGCCCATGACGC    |
| tbp-1_R     | CAGGCACGGGCCAGCAATGT    |
